and other factors held constant during this study) is equal to internal heat production. After 2 h of anesthesia, mean steady-state temperatures were identical in both groups, demonstrating that halothane/O<sub>2</sub> and N<sub>2</sub>O/fentanyl anesthesia have comparable effects on heat balance. It is unlikely that central control (thermoregulatory inhibition) caused virtually identical hypothermia during two dissimilar anesthetic regimens. However, these data do not exclude the possibility that the degree of anesthetic-induced thermoregulatory inhibition depends on anesthetic depth, not type.

In summary, we compared changes in rectal temperatures in patients undergoing eye surgery during N<sub>2</sub>O/fentanyl or halothane/O<sub>2</sub> anesthesia, and found no significant differences between groups. In both, average temperatures decreased 0.6° C and reached a thermal steady state at 36.2° C after 2 h of anesthesia.

The authors acknowledge the editorial assistance of Winifred von Ehrenburg, and thank Mon-a-Therm®, Inc., for their gift of thermometers and thermocouple probes.

#### REFERENCES

1. Flacke W: Temperature regulation and anesthesia. *Int Anesthesiol Clin* 2:43-54, 1963
2. Humphreys RB, Hawkins M, Lipton JM: Effects of anesthetic

- injected into brainstem sites on body temperature and behavioral thermoregulation. *Physiol Behav* 17:667-674, 1976
3. Jell RM, Gloor P: Distribution of thermosensitive and nonthermosensitive preoptic and anterior hypothalamic neurons in unanesthetized cats, and effects of some anesthetics. *Can J Physiol Pharmacol* 50:890-901, 1972
4. Smith NT: Subcutaneous, muscle, and body temperatures in anesthetized man. *J Appl Physiol* 17:306-310, 1962
5. Holdcroft A, Hall GM: Heat loss during anaesthesia. *Br J Anaesth* 50:157-164, 1978
6. Tammisto T, Rosenberg P, Elfving G: The effect of anaesthesia and operation on skin and muscle temperature of the lower limbs. *Ann Chir Gynaecol* 58:36-41, 1969
7. Pertwee RG, Marshall NR, MacDonald AG: The effect of subanaesthetic partial pressures of nitrous oxide and nitrogen on behavioural thermoregulation in mice. *Homeostasis and Thermal Stress: Experimental and Therapeutic Advances*. Edited by Cooper K, Lomax P, Schonbaum E, Veale WL. New York, Karger, 1986, pp 19-21
8. Whitby JD, Dunkin LF: Temperature differences in the oesophagus. *Br J Anaesth* 40:991-995, 1968
9. Wallace CT, Marks WE, Adkins WY, Mahafey JE: Perforation of the tympanic membrane, a complication of tympanic thermometry during anesthesia. *ANESTHESIOLOGY* 41:290-291, 1974
10. Cork RC, Vaughan RW, Humphrey LS: Precision and accuracy of intraoperative temperature monitoring. *Anesth Analg* 62:211-214, 1983
11. Holdcroft A, Hall GM, Cooper GM: Redistribution of body heat during anaesthesia. *Anaesthesia* 34:758-764, 1979
12. Pflug AE, Aasheim GM, Foster C, Martin RW: Prevention of post-anaesthesia shivering. *Can Anaesth Soc J* 25:43-49, 1978

Anesthesiology  
67:139-142, 1987

## Changes in EEG Spectral Edge Frequency Correlate with the Hemodynamic Response to Laryngoscopy and Intubation

IRA J. RAMPIL, M.S., M.D.,\* RICHARD S. MATTEO, M.D.†

Laryngoscopy and intubation of the trachea frequently produce tachycardia, hypertension, and increased serum concentrations of catecholamines.<sup>1,2</sup> These responses may be exaggerated or lead to in-

creased morbidity in patients with hypertension,<sup>3</sup> coronary artery disease,<sup>4</sup> intracranial aneurysm,<sup>5</sup> or increased intracranial pressure.<sup>6,7</sup> However, these responses may be blunted either by ensuring an adequate depth of anesthesia prior to laryngoscopy or administering an additional, nonanesthetic drug to block the sympathetic response.<sup>8-10</sup>

Because the electroencephalogram (EEG) is an indicator of the electrical activity of the cerebral cortex, it may provide a clinically useful measure of the degree of cerebral depression following a dose of anesthetic. Moreover, the EEG signal may be processed to provide a quantitative value which represents underlying electrical activity. One such parameter is the Spectral Edge Frequency (SEF),<sup>11</sup> which reflects the highest frequency present in the EEG signal and is particularly sensitive to

\* Fellow in Neuroanesthesia, University of California.

† Professor of Anesthesia, Columbia University.

Received from the Departments of Anesthesiology, University of California, San Francisco, California; and College of Physicians and Surgeons, Columbia University, New York, New York. Accepted for publication February 23, 1987. Presented in part at the Third International Symposium on Computing in Anesthesia, Santa Monica, 1985. An abstract of this work appeared in *J Clin Mon* 1:89, 1985.

Address reprint requests to Dr. Rampil: Department of Anesthesia, University of California, San Francisco, California 94143-0648.

Key words: Anesthesia: depth. Blood pressure. Intubation: endotracheal. Monitoring: electroencephalography; spectral edge frequency.

TABLE 1. Hemodynamic Responses in Groups I and II (Mean  $\pm$  S.E.)

| Variable                                | Group I<br>(SEF < 14 Hz) | Group II<br>(SEF $\geq$ 14 Hz) |
|-----------------------------------------|--------------------------|--------------------------------|
| Systolic BP (pre-induction) (mmHg)      | 138 $\pm$ 4              | 146 $\pm$ 3                    |
| Systolic BP (pre-laryngoscopy) (mmHg)   | 125 $\pm$ 7              | 119 $\pm$ 4                    |
| Systolic BP (maximal) (mmHg)            | 141 $\pm$ 8              | 164 $\pm$ 6*                   |
| Systolic BP (% $\Delta$ above baseline) | 12 $\pm$ 2               | 40 $\pm$ 4†                    |
| HR (pre-induction) (bpm)                | 78 $\pm$ 7               | 83 $\pm$ 5                     |
| HR (pre-laryngoscopy) (bpm)             | 82 $\pm$ 6               | 84 $\pm$ 4                     |
| HR (maximal) (bpm)                      | 92 $\pm$ 7               | 101 $\pm$ 4                    |
| HR (% $\Delta$ above baseline)          | 13 $\pm$ 6               | 23 $\pm$ 4                     |
| SEF (pre-induction) (Hz)                | 16 $\pm$ 2               | 16 $\pm$ 1                     |
| SEF (pre-laryngoscopy) (Hz)             | 9 $\pm$ 1                | 17 $\pm$ .6†                   |
| Fentanyl ( $\mu$ g)                     | 94 $\pm$ 80              | 72 $\pm$ 108                   |
| Droperidol (mg)                         | 1.5 $\pm$ 3              | 1. $\pm$ 3                     |

\*  $P < 0.05$ .†  $P < 0.0001$ .

the "anesthetic-induced fast activity" usually present during light and moderate depths of anesthesia.

The SEF compresses the EEG voltage waveform into a single number, and thus simplifies the interpretation of EEG patterns. However, this compression is at the expense of information regarding the slower EEG waveforms. Nevertheless, the SEF, in human subjects, correlates with serum levels of thiopental,<sup>12</sup> etomidate,<sup>13</sup> and fentanyl,<sup>14</sup> and with end-tidal concentrations of halothane.<sup>15</sup> If the SEF reflects the electrical state of the brain as an anesthetic drug is distributed, then it may be an accurate, time-varying indicator of anesthetic depth. In the present study, we correlate SEF depression after induction of anesthesia with predominantly thiopental to the hemodynamic response to laryngoscopy and endotracheal intubation. If the degree of SEF depression prior to laryngoscopy predicts the magnitude of arterial blood pressure response following the stimulus, it may be a useful prognostic indicator, particularly for patients with coronary-artery disease or a cerebral aneurysm.

#### METHODS

Institutional Review Board approval was obtained for EEG monitoring in 32 consecutive adult patients undergoing extracranial cerebrovascular procedures. None of the patients had physically apparent neurological deficits at the time of study. No sedative drugs were given preoperatively. The timing of drug administration for anesthetic induction was at the discretion of the responsible anesthesiologist. All patients received d-tubocurarine (3 mg iv), oxygen, and a test dose of thiopental (50 mg iv), followed by thiopental (3–5 mg/kg

iv), succinylcholine (1.5 mg/kg iv), lidocaine (75–100 mg iv), and fentanyl and droperidol at doses determined by the anesthesiologist (table 1). Patients were ventilated with oxygen *via* a face mask until direct laryngoscopy was performed at a time determined by the responsible anesthesiologist using only standard clinical signs and hemodynamic data. The duration of laryngoscopy ranged from 15–30 s. In cases of failed tracheal intubation, only data from the first laryngoscopy were included in the study. Volatile anesthetics were not used prior to endotracheal intubation.

All patients were monitored by electrocardiogram (ECG) and an automatic oscillometric blood pressure device set to measure at 1-min intervals throughout the study. For continuous measurement of blood pressure, all but one patient also had an indwelling radial arterial catheter placed before induction of anesthesia in the arm contralateral to the blood pressure cuff.

The scalp EEG was recorded over each cerebral hemisphere using standard ECG adhesive disk electrodes placed bilaterally in a frontal-ipsilateral mastoid configuration. The skin of each patient was prepared with OmniPrep™ (DO Weaver, Denver CO), and electrode placement was adjusted until impedances were all below 5,000 ohms. EEG signals were analyzed by a Neurotrac™ (Interspec, Conshohocken, PA) which displayed the resulting spectral data in the Compressed Spectral Array (CSA) format. Data were updated every 4 s, and overlaid with the calculated SEF. The responsible anesthesiologist was blinded to the EEG. The actual algorithm incorporated in the commercial EEG monitor used in this study is in concordance with the original description of the SEF as given by author IJR.<sup>11</sup> This algorithm searches each newly calculated EEG frequency spectra for the highest frequency contiguous 2 Hz wide band of activity. Each frequency bin of the spectra within this band contains more than a threshold quantity of power (generally Total EEG Power/256). The upper frequency limit of this band of activity is designated as the Spectral Edge Frequency. It has been the experience of the author (IJR) that this pattern matching method provides additional noise immunity and increased sensitivity to anesthetic induced changes in the EEG over the 95th percentile approach<sup>12,15</sup> to the calculation of SEF.

Values for the systolic arterial blood pressure (BP), heart rate (HR), and SEF for each hemisphere were recorded at the following times: 1) awake, eyes closed; 2) post-induction, immediately before laryngoscopy and intubation; and 3) at the time of maximal BP following laryngoscopy. Monitoring continued for at least 5 min following laryngoscopy. The values recorded for the SEF were the combined averages of both channels over a 16-s interval centered at the time of interest.

In a previous pilot study of 18 patients, we found that patients whose SEF was equal to or greater than 14 Hz immediately prior to laryngoscopy were likely to exhibit a significant hypertensive response to the stimulation. The patients in this study were therefore assigned to two groups prior to laryngoscopy. Group I (n = 9) had a slow EEG, SEF < 14 Hz. Group II (n = 23) had a less depressed EEG, SEF ≥ 14 Hz. Data were analyzed by *t* test, Fisher Exact test, and plotted. A *P* value < 0.05 was considered significant.

### RESULTS

No significant or sustained differences in SEF were appreciated between EEG channels. There were no significant differences between groups in preinduction SEF, or in their BP, HR, or average dose of fentanyl or droperidol before laryngoscopy (table 1). Following laryngoscopy, group II differed significantly from group I in maximal systolic BP and in the percent rise in BP (from pre-laryngoscopy). Systolic blood pressure rose  $40 \pm 4\%$  (SE) in group II versus only  $12 \pm 2\%$  in group I (*P* < .05). Heart rate response to laryngoscopy did not differ significantly. Of the nine patients in group I, only one had an increase in systolic BP greater than 20%. Of the 23 patients in group II, twenty had increases in systolic BP of greater than 20%. A Fisher Exact test suggested a statistically significance difference (*P* = 0.0001) between the rates of hypertensive responses in the two groups. A scatterplot of the pre-laryngoscopy SEF versus the percent change in systolic BP is shown in figure 1. A scatterplot of the pre-laryngoscopy SEF versus the percent change in mean arterial pressure revealed an almost identical relationship, whereas there was no apparent relationship between the SEF and the percent change in diastolic blood pressure. All of the patients with a maximal systolic BP of greater than 180 mmHg were in group II (SEF ≥ 14 Hz). We observed no correlation ( $r^2 = 0.14$ ) between the pre-laryngoscopy systolic BP value and the percent change in systolic BP following laryngoscopy, as illustrated in figure 2. There was also no correlation between the decrease in BP following induction and either the maximal BP or the percentage increase in BP following laryngoscopy.

### DISCUSSION

This is the first report of a correlation between EEG and the hemodynamic response to laryngoscopy. Our results suggest that if, during anesthesia with thiopental, the SEF is <14 Hz, the blood pressure response to direct laryngoscopy may be minimal. If the SEF ≥ 14 Hz, the blood pressure response may be exaggerated and, possibly, clinically undesirable.

Management of the stress response to laryngoscopy

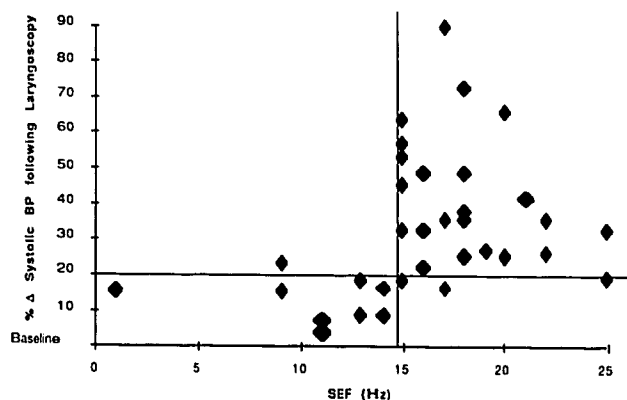

FIG. 1. A scatterplot of the SEF immediately prior to laryngoscopy and intubation for each patient, and the corresponding maximal systolic blood pressure following laryngoscopy as a percentage of the prelaryngoscopy pressure.

has received substantial attention in the literature.<sup>8,9,16-18</sup> This response is a centrally mediated sympathetic reflex. Although the EEG only reflects the cerebral cortical activity, it appears to correlate with the depression in function of the deeper brain structures which is necessary to obtund the stress response during anesthesia with thiopental and adjuvants. The use of processed, but non-quantitative, EEG during fentanyl or fentanyl/clonidine reportedly demonstrates the slowing in EEG patterns (predominance of delta activity [ $<3.5$  Hz]) consistent with an appropriate depth of anesthesia for laryngoscopy.<sup>16</sup> Small doses of fentanyl in combination with thiopental also may be effective in blunting hemodynamic responses to laryngoscopy.<sup>8</sup> Similarly, lidocaine administered intravenously<sup>9</sup> or sprayed topically on retropharynx, larynx, and trachea<sup>17</sup> may blunt these responses, although its efficacy is

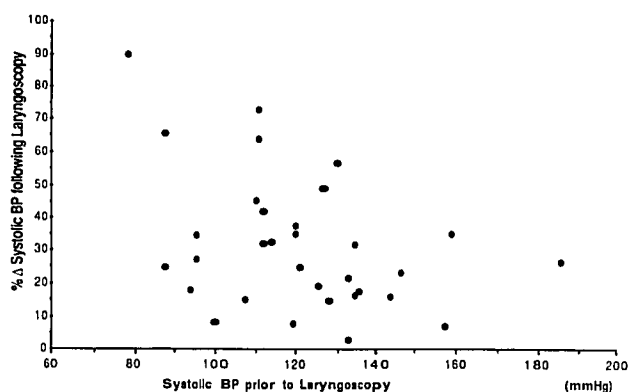

FIG. 2. The relationship between the systolic blood pressure immediately prior to laryngoscopy, and the magnitude of the increase to maximal blood pressure following the stimulus as a percentage of the prelaryngoscopy pressure.

controversial.<sup>18</sup> Non-anesthetic drugs with predominantly peripheral actions, such as esmolol<sup>10</sup> or nitroprusside,<sup>19</sup> may also provide prophylaxis against the stress response without significant effect on the EEG.

Because other anesthetics create different EEG patterns, SEF criteria different from those used with thiopental may be required. In addition, the effects of vasoactive drugs, such as  $\beta$ -adrenergic blocking drugs or antihypertensive agents, may alter the sympathetic stress response and thus reduce the predictive value of EEG monitoring.

Monitoring the EEG appears to provide a sensitive, convenient measure of the depth of anesthesia during induction with thiopental and adjuvants. Moreover, under the conditions obtained in this study, the degree of SEF depression prior to laryngoscopy and intubation of the trachea appears to predict the magnitude of the blood pressure response following the stimulus. In contrast, in this group of patients, the systolic blood pressure prior to laryngoscopy did not predict the hemodynamic response. In patients with coronary-artery disease or cerebral aneurysms, the SEF may be used to adjust the anesthetic dose to ensure an adequate depth of anesthesia prior to stimulation.

The authors wish to thank Dr. J. Correll for his cooperation in this study, and Ms. W. von Ehrenburg for her editorial assistance.

#### REFERENCES

1. Prys-Roberts C, Greene LT, Meloche R, Foëx P: Studies of anaesthesia in relation to hypertension. II: Haemodynamic consequences of induction and endotracheal intubation. *Br J Anaesth* 43:531-47, 1971
2. Stoelting RK, Peterson C: Circulatory changes during anesthetic induction: Impact of *d*-tubocurarine pretreatment, thiamylal, succinylcholine, laryngoscopy, and tracheal lidocaine. *Anesth Analg* 55:77-81, 1976
3. Low JM, Harvey JT, Prys-Roberts C, Dagnino J: Studies of anesthesia in relation to hypertension. VII: Adrenergic responses to laryngoscopy. *Br J Anaesth* 58:571-577, 1986
4. Bassell GM, Lin YT, Oka Y, Becker RM, Frater RW: Circulatory response to tracheal intubation in patients with coronary artery disease and valvular disease. *Bull NY Acad Med* 54:842-848, 1978
5. Sundt TM, Kobayashi S, Fode NC, Whisnant JP: Results and complications of surgical management of 809 intracranial aneurysms in 722 cases. *J Neurosurg* 56:753-765, 1982
6. Shapiro HM: Intracranial hypertension. *ANESTHESIOLOGY* 43:445-471, 1975
7. Moss E, Powell D, Gibson NM, McDowall DG: Effects of tracheal intubation on intracranial pressure following induction of anesthesia with thiopental. *Br J Anaesth* 50:353-360, 1978
8. Martin DE, Rosenberg H, Auckburg SJ, Bartkowski RR, Edwards MW, Greenhow DE, Klineberg PL: Low dose fentanyl blunts circulatory responses to tracheal intubation. *Anesth Analg* 61:680-684, 1982
9. Abou-Madi MN, Keszler H, Yacoub JM: Cardiovascular reactions to laryngoscopy and tracheal intubation following small and large intravenous doses of lidocaine. *Can Anaesth Soc J* 24:12-19, 1977
10. Cucchiara RF, Benefield DJ, Matteo RS, DeWood M, Albin MS: Evaluation of esmolol in controlling increases in heart rate and blood pressure during endotracheal intubation in patients undergoing carotid endarterectomy. *ANESTHESIOLOGY* 65:528-531, 1986
11. Rampil IJ, Holzer JA, Quest DO, Rosenbaum SH, Correll JW: Prognostic value of computerized EEG analysis during carotid endarterectomy. *Anesth Analg* 62:186-192, 1983
12. Hudson RJ, Stanski DR, Saidman LJ, Meathe E: A model for studying depth of anesthesia and acute tolerance to thiopental. *ANESTHESIOLOGY* 59:301-308, 1983
13. Arden JR, Holley FO, Stanski DR: Pharmacokinetic and pharmacodynamic model of etomidate's EEG effects (abstract). *ANESTHESIOLOGY* 61:A341, 1984
14. Scott JC, Ponganis KV, Stanski DR: EEG quantitation of narcotic effect: The comparative pharmacodynamics of fentanyl and alfentanil. *ANESTHESIOLOGY* 62:234-241, 1985
15. Rampil IJ, Smith NT: Comparison of EEG indices during halothane anesthesia (abstract). *J Clin Mon* 1:89, 1985
16. Ghignone M, Quintin L, Duke PC, Kehler CH, Cavillo O: Effects of clonidine on narcotic requirements and hemodynamic response during induction of fentanyl anesthesia and endotracheal intubation. *ANESTHESIOLOGY* 64:36-42, 1986
17. Denlinger JK, Ellison N, Ominsky AJ: Effects of intratracheal lidocaine on circulatory responses to tracheal intubation. *ANESTHESIOLOGY* 41:409-412, 1974
18. Chraemmer-Jørgensen B, Høilund-Carlsen PF, Marving J, Christensen V: Lack of effect of intravenous lidocaine on hemodynamic responses to rapid sequence induction of general anesthesia: A double blind controlled clinical trial. *Anesth Analg* 65:1037-1041, 1986
19. Stoelting RK: Attenuation of blood pressure response to laryngoscopy and tracheal intubation with sodium nitroprusside. *Anesth Analg* 58:116-119, 1979
